# Supplementary material for: AIE fluorophore with enhanced cellular uptake for tracking esterase-activated release of taurine and ROS scavenging
Source: Royal Society of Chemistry journal article supplement (doi:10.1039/c6fd00118a), 2016-06-14
Supplement: c6fd00118a1.pdf [file c6fd00118a1.pdf]

## Electronic Supplementary Information

### **AIE fluorophore with enhanced cellular uptake for tracking esterase-activated release of taurine and ROS scavenging**

Jun Wang<sup>†</sup>, Yinglong Wu<sup>†</sup>, Fang Zeng<sup>\*</sup>, Shuailing Huang, and Shuizhu Wu<sup>\*</sup>

College of Materials Science & Engineering, State Key Laboratory of Luminescent Materials &  
Devices, South China University of Technology, Guangzhou 510640, China

<sup>†</sup> These authors contributed equally to this work.

<sup>\*</sup> To whom correspondence should be addressed. E-mail: mcfzeng@scut.edu.cn,  
shzhwu@scut.edu.cn

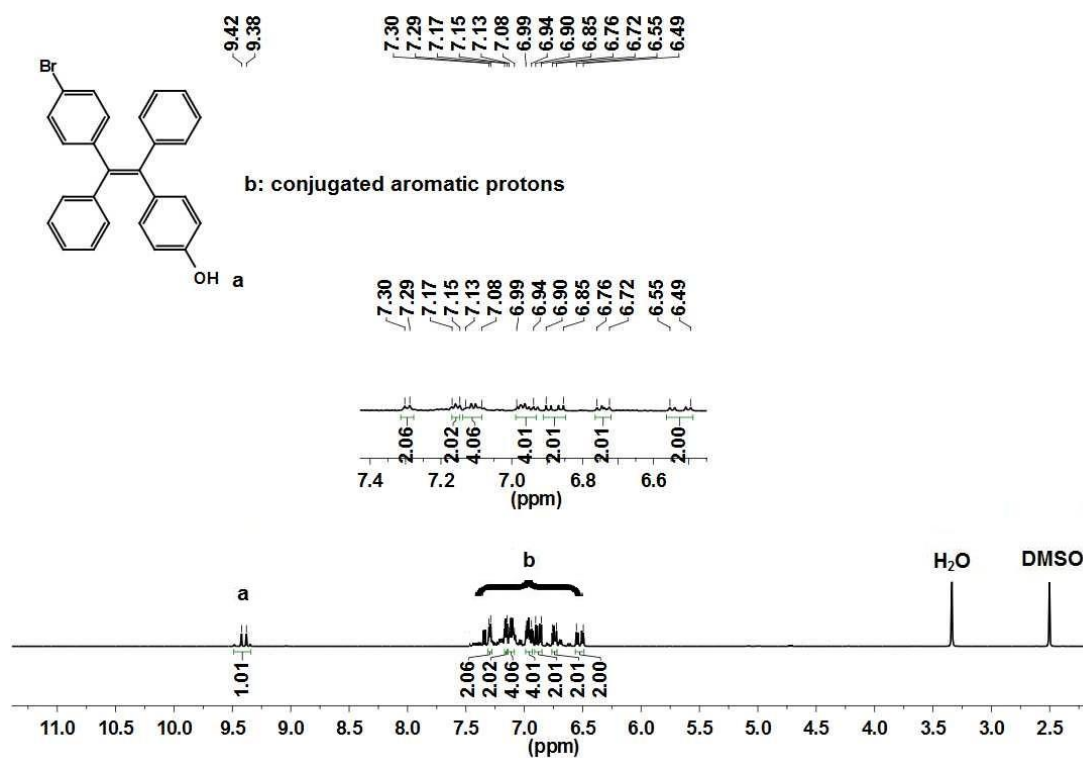

Fig. S1 <sup>1</sup>H NMR spectrum of Compound 3 in DMSO.

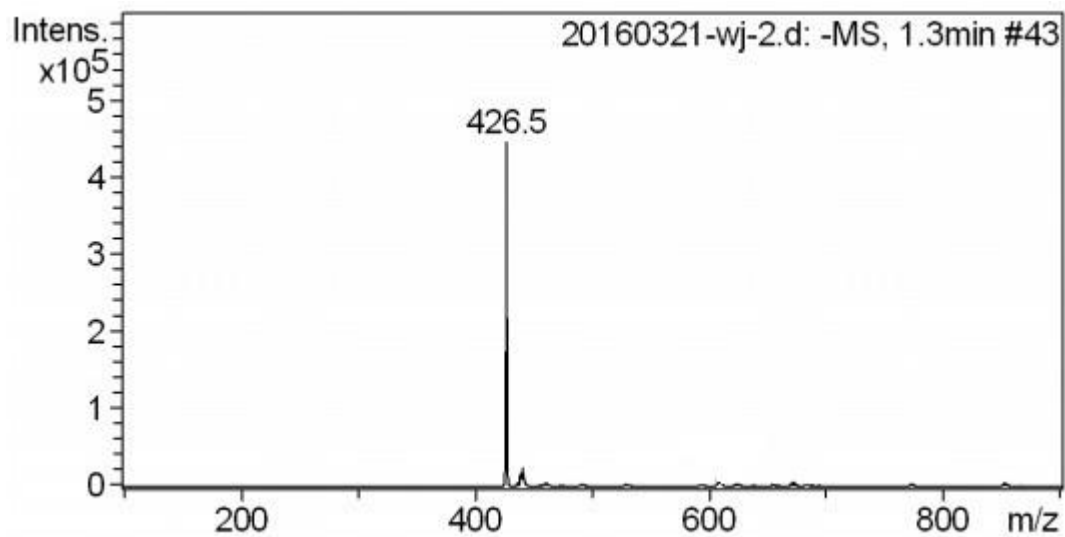

Fig. S2 Mass spectrum of Compound 3. MS (ESI):  $m/z$  426.5 [M].

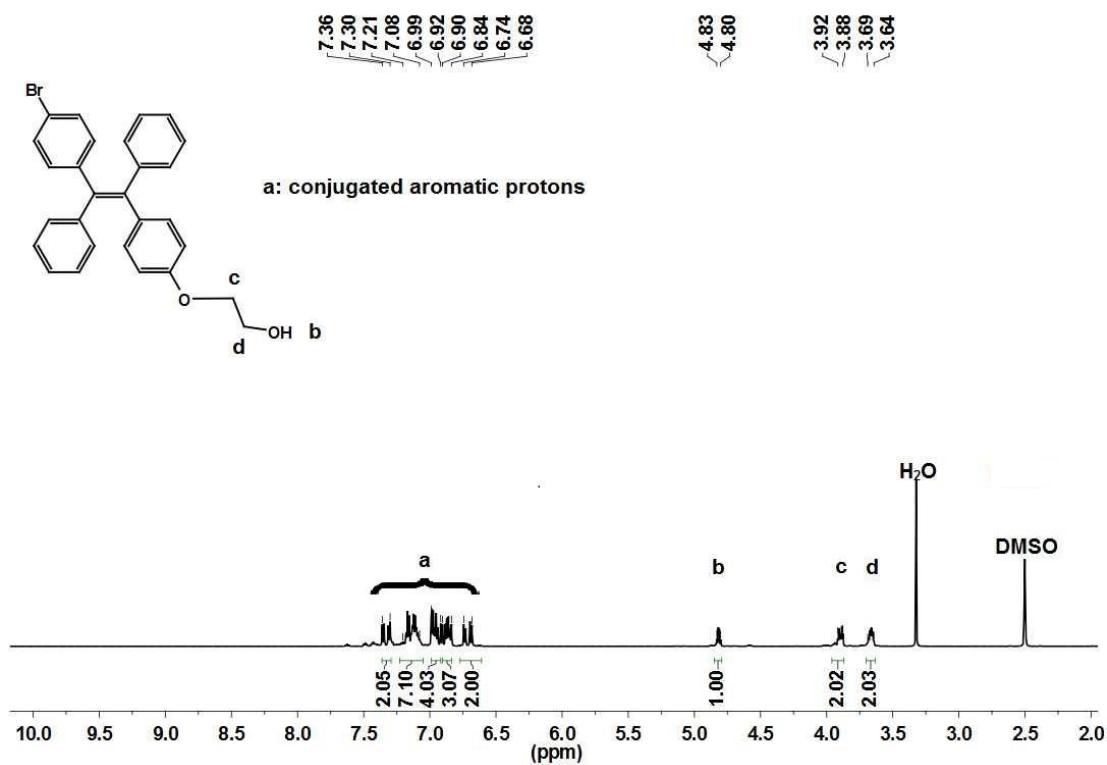

Fig. S3 <sup>1</sup>H NMR spectrum of Compound 5 in DMSO.

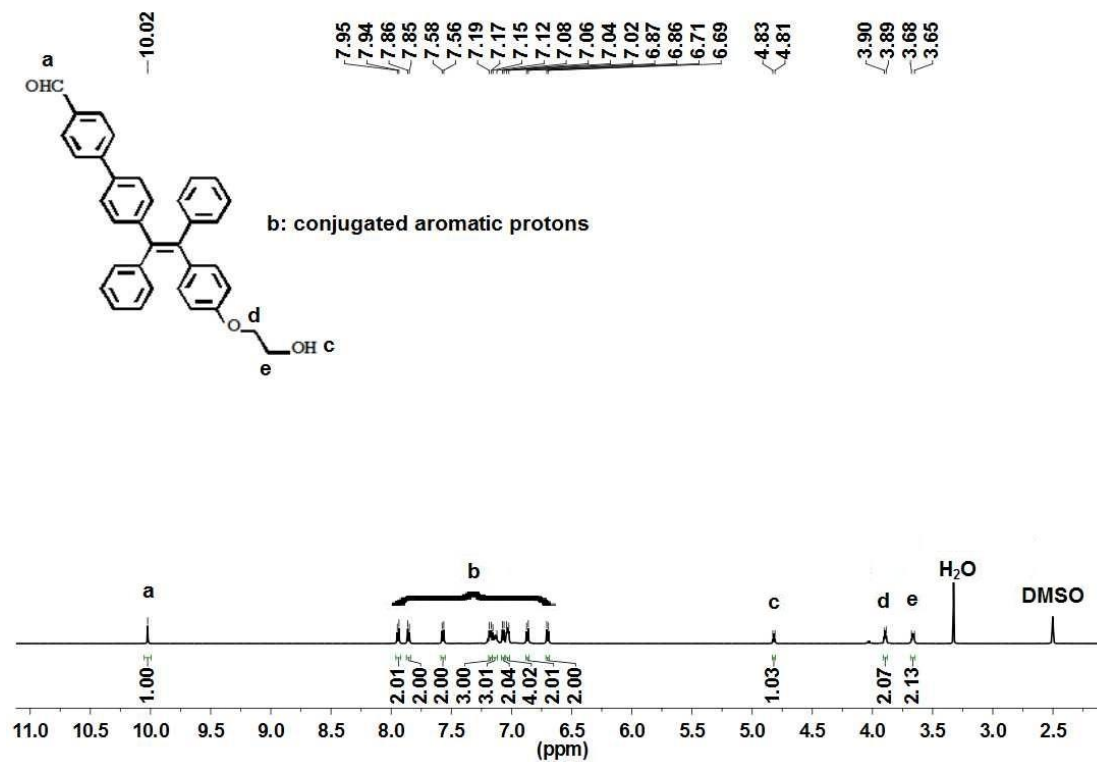

Fig. S4 <sup>1</sup>H NMR spectrum of Compound 7 in DMSO.

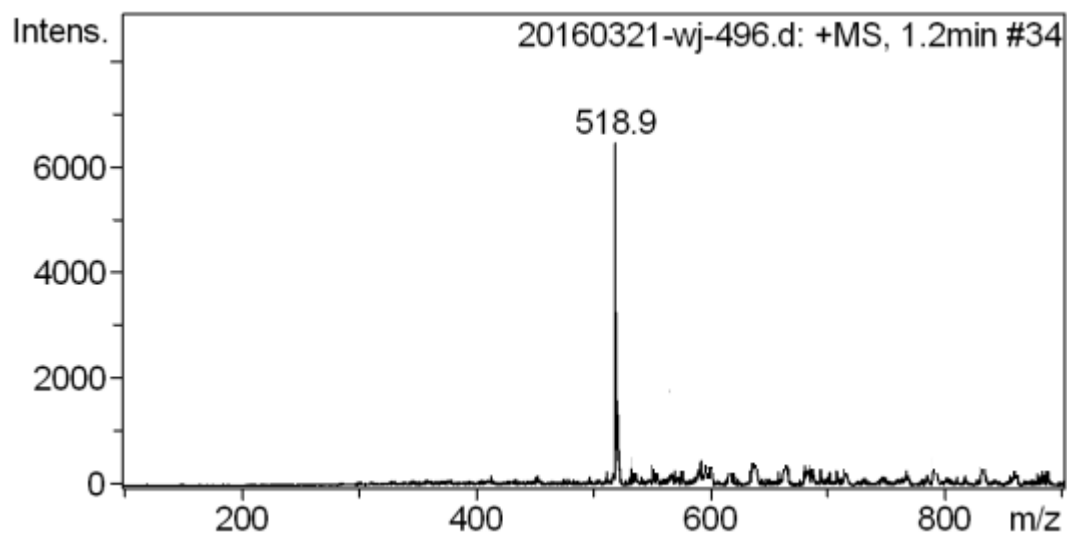

Fig. S5 Mass spectrum of Compound 7. MS (ESI):  $m/z$  518.9  $[M]^+$ .

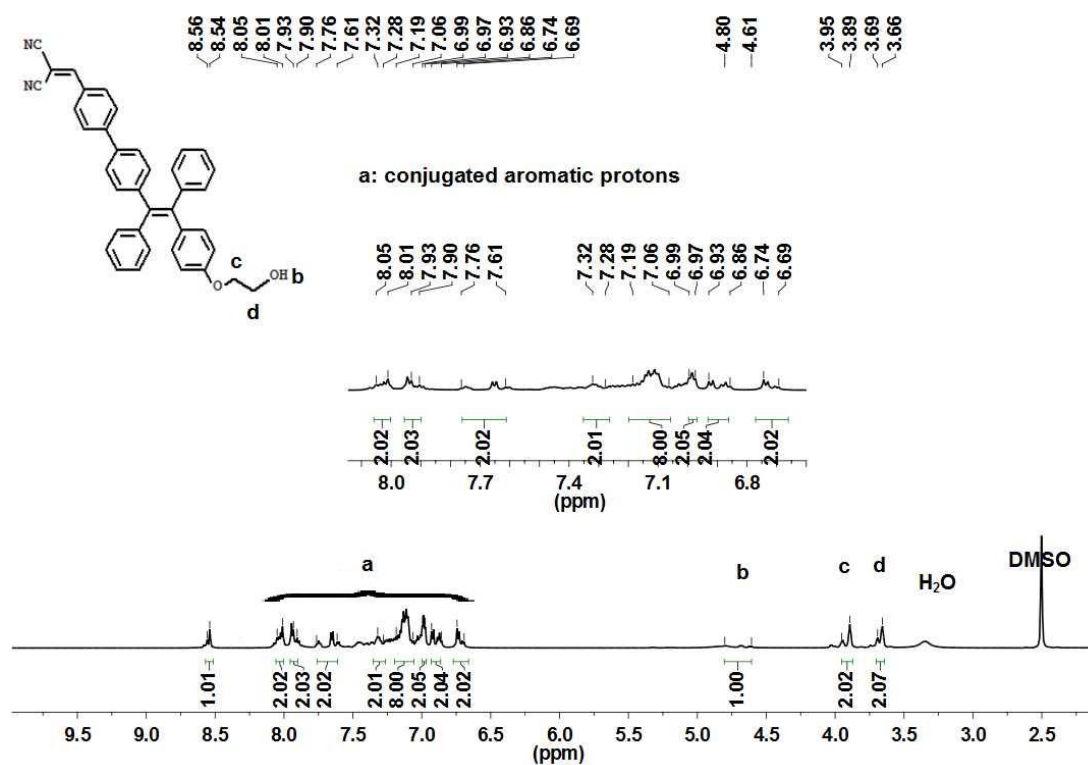

Fig. S6  $^1\text{H}$  NMR spectrum of Compound 9 in DMSO.

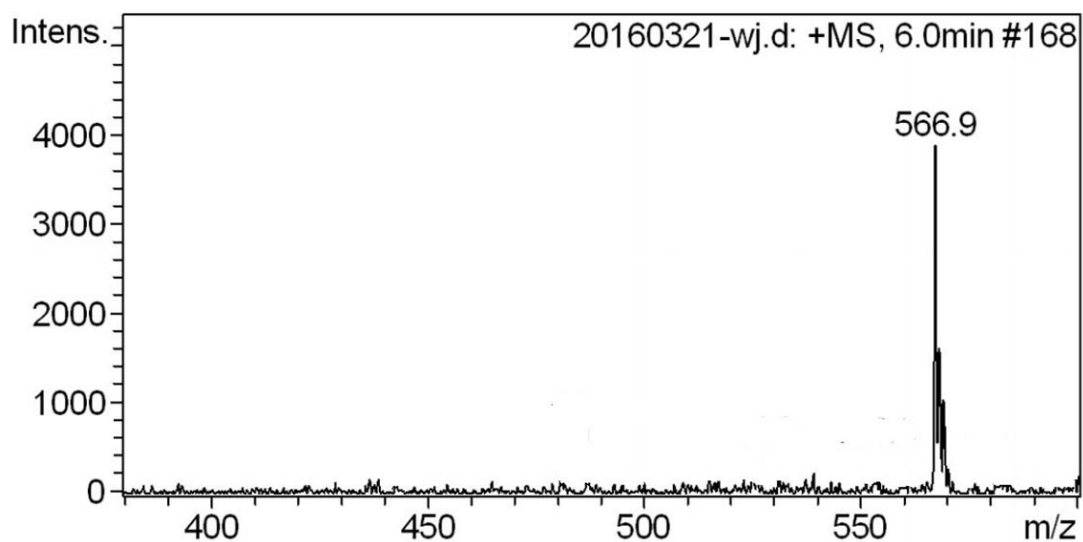

Fig. S7 Mass spectrum of Compound 9. MS (ESI):  $m/z$  566.9  $[M]^+$ .

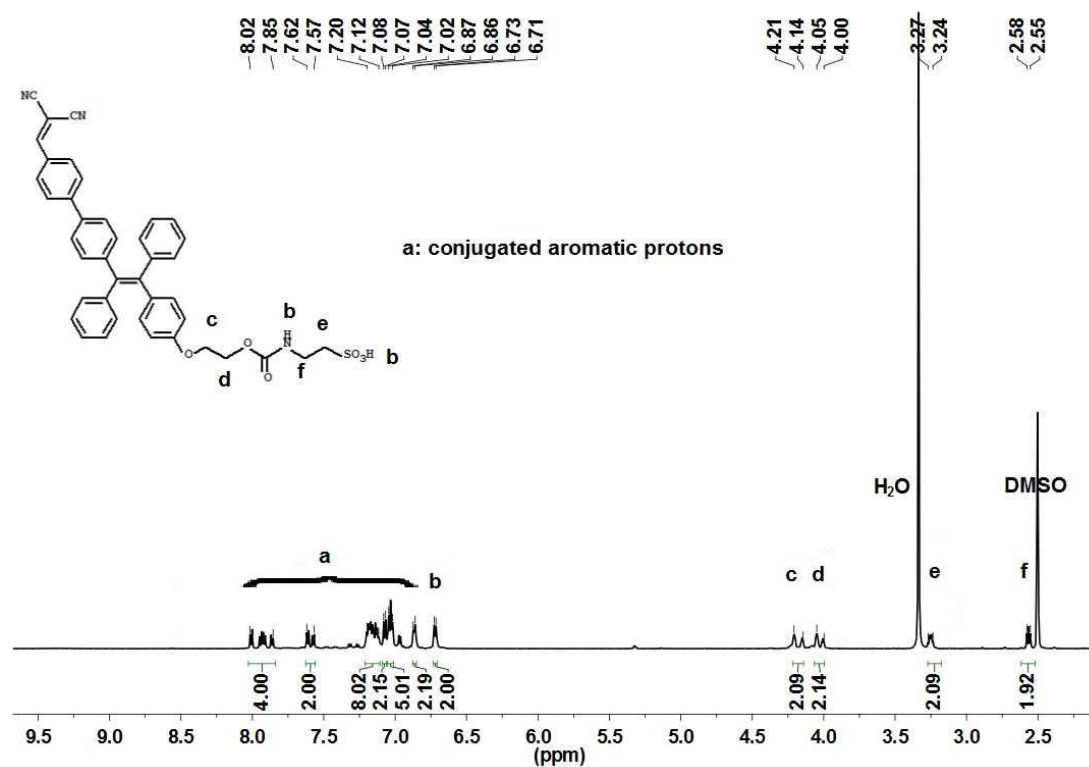

Fig. S8  $^1\text{H}$  NMR spectra of Compound 13 in DMSO.

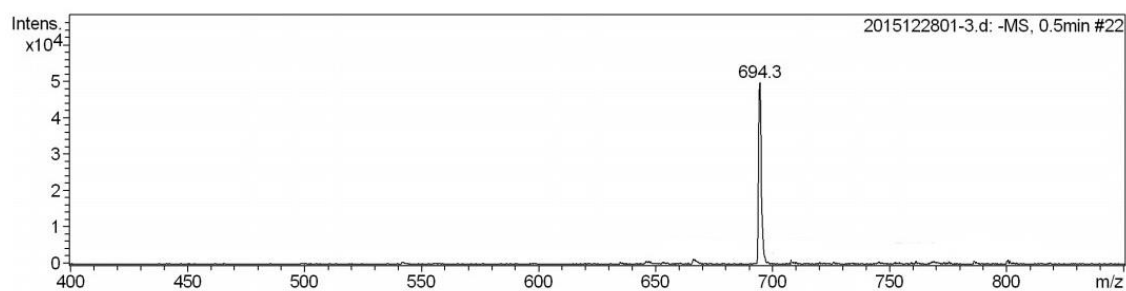

**Fig. S9** Mass spectrum of Compound **13**. MS (ESI):  $m/z$  694.3 [M].

| <small>Match</small><br><small>RT</small><br><small>Intensity</small><br><small>Library</small><br><small>Formula</small> | Compound Name (Library Hit)      | Formula                                                | Intensity | Threshold | Expected $m/z$ | Found at $m/z$ | Error (ppm) |
|---------------------------------------------------------------------------------------------------------------------------|----------------------------------|--------------------------------------------------------|-----------|-----------|----------------|----------------|-------------|
| ✓<br>✓<br>✓<br>✓<br>✓                                                                                                     | 695.209007984 (No Acquired MSMS) | C <sub>41</sub> H <sub>33</sub> N <sub>3</sub> O<br>6S | 21281     | 50        | 696.2163       | 696.2157       | -0.9        |

● Spectrum from sample D.wiff (sample 1) - Sample005, Experiment 1, +TOF MS (100 - 1000) from 0.134 to 0.166 min  
 ● C<sub>41</sub>H<sub>33</sub>N<sub>3</sub>O<sub>6</sub>S +H

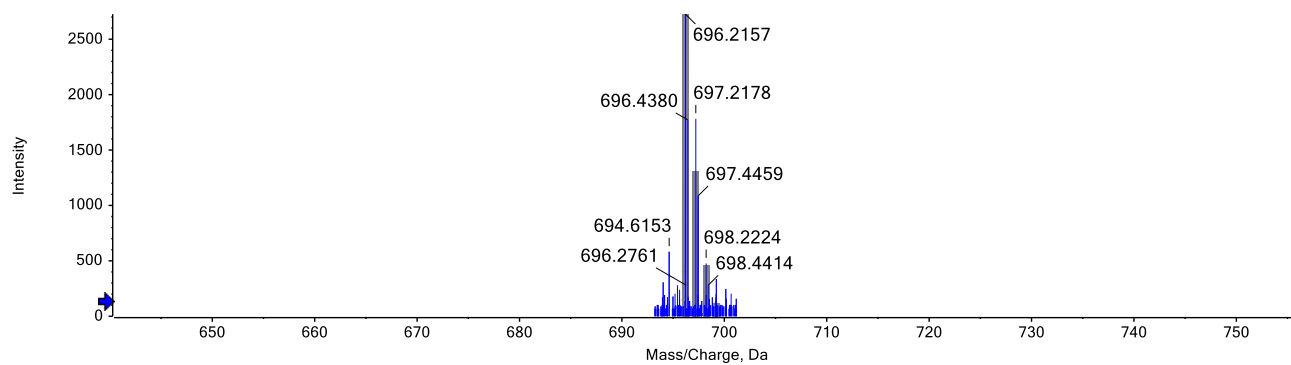

**Fig. S10** High resolution mass spectrum (HRMS) of Compound **13**.

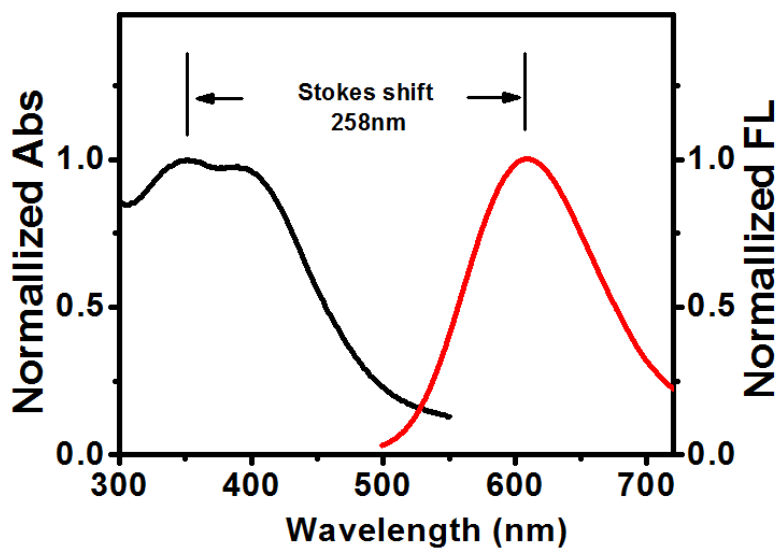

**Fig. S11** Normalized absorption spectra (black) and fluorescence spectra (red) of CTPE in 10mM PBS (pH = 7.4) containing 0.5% DMSO.

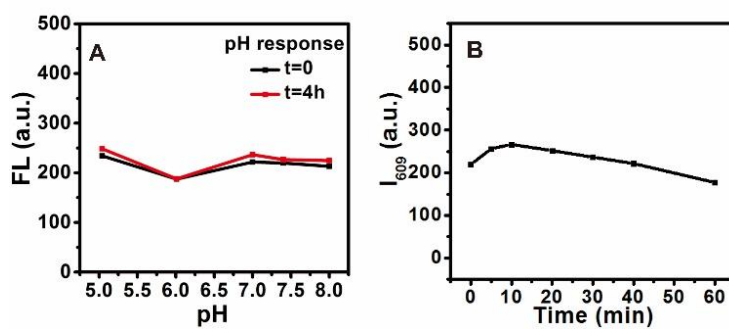

**Fig. S12** (A) Fluorescent intensity of CTPE in different PBS buffer solutions from pH=5.0 to pH=8.0 before and after 4h heating at 37°C by water bath , (B) Photo-bleaching of CTPE upon exposure to 365 nm UV.

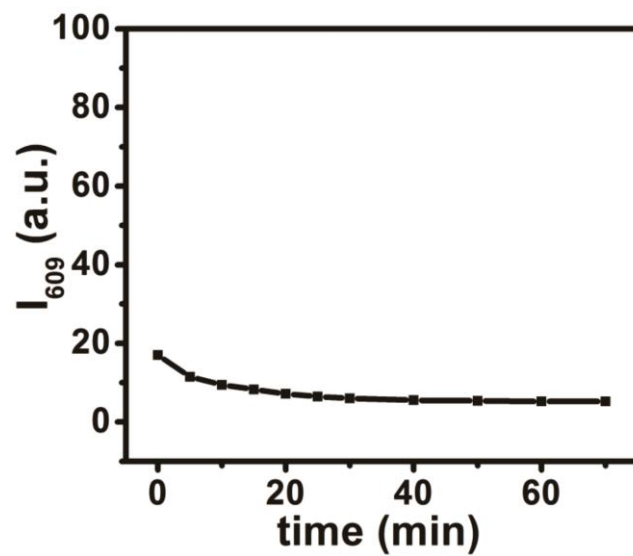

**Fig. S13** Fluorescent intensity curve of CTPe-Tau for acid response versus time in 10 mM PBS (pH = 5.0) containing 0.5% DMSO.

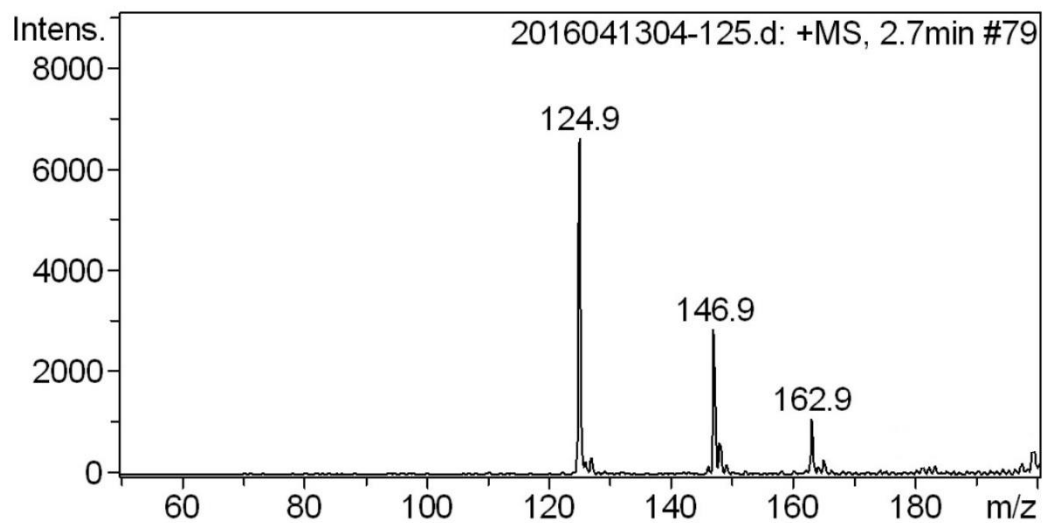

**Fig. S14** Mass spectrum of CTPe-Tau after incubation with esterase at 37°C for 1h.



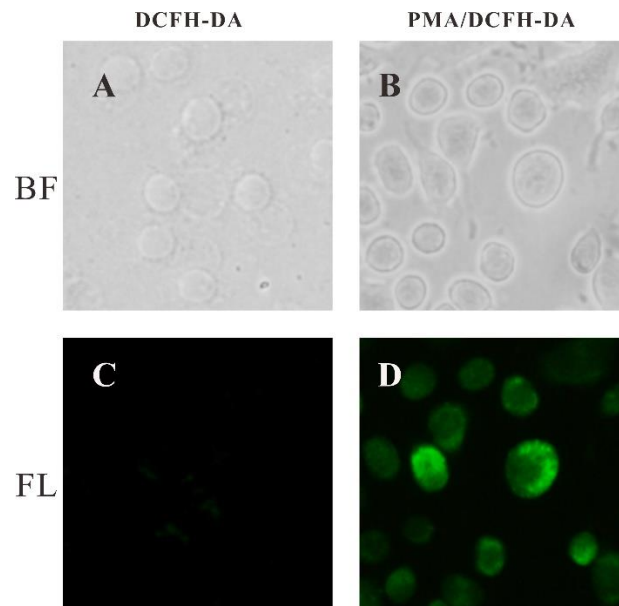

**Fig. S15** Fluorescence images of RAW 264.7 cells (A, C) incubated in culture medium without any stimulation followed by incubated with DCFH-DA 10  $\mu$ M for 30 min, (B, D) stimulated with 6 mg/mL PMA for 30 min, washed with PBS three times and then incubated in culture medium for 4h followed by DCFH-DA 10  $\mu$ M for 30 min.

**Table S1. Comparison of the system herein with other reported esterase-responsive fluorophores and AIE-active fluorophores**

| Fluorophores                                                                                       | Stokes shift | Esterase response | Esterase-activated drug release |
|----------------------------------------------------------------------------------------------------|--------------|-------------------|---------------------------------|
| 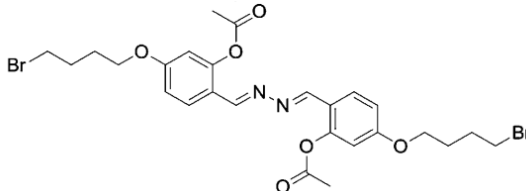                  | 176 nm       | yes               | no                              |
| <p><i>J. Mater. Chem. B</i>, 2014, 2, 3438</p>                                                     |              |                   |                                 |
|                   | <40 nm       | yes               | no                              |
| <p><i>Chem. Commun.</i>, 2009, 7015-7017</p>                                                       |              |                   |                                 |
|                 | <40 nm       | yes               | no                              |
| <p><i>Chem. Sci.</i>, 2011, 2, 521-530</p>                                                         |              |                   |                                 |
|                 | <40 nm       | yes               | no                              |
| <p><i>Analyst.</i>, 2012, 137, 716-721</p>                                                         |              |                   |                                 |
|  <p>TPE-Bac</p> | 200 nm       | no                | no                              |

---

*ACS Appl. Mater. Interfaces*, 2015, 7,  
7180-7188

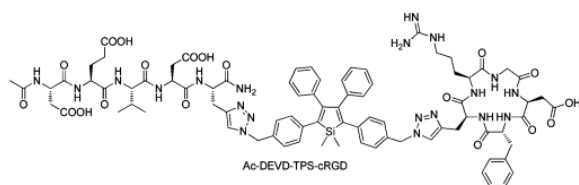

130  
nm      no      no

*Analyst.*, 2012, 137, 716-721

---
